# Supplementary material for: Genetic dissection of Rift Valley fever pathogenesis: Rvfs2 locus on mouse chromosome 11 enables survival to early-onset hepatitis
Source: PubMed Central journal article supplement (PMC7250886; doi:10.1038/s41598-020-65683-w), 2020-05-26
Supplement: 41598_2020_65683_MOESM1_ESM.pdf [file 41598_2020_65683_MOESM1_ESM.pdf]

## SUPPLEMENTARY INFORMATION

### Manuscript title:

**Genetic dissection of Rift Valley fever pathogenesis:**

***Rvfs2* locus on mouse chromosome 11 enables survival to early-onset hepatitis**

### Authors :

Leandro Batista,<sup>1,2</sup> Gregory Jouvion,<sup>4,5</sup> Dominique Simon-Chazottes,<sup>1,3</sup> Denis Houzelstein,<sup>1</sup> Odile Burlen-Defranoux,<sup>6</sup> Magali Boissière,<sup>7</sup> Satoko Tokuda,<sup>1</sup> Tania Zaverucha Do Valle,<sup>1,8</sup> Ana Cumano,<sup>6</sup> Marie Flamand,<sup>7</sup> Xavier Montagutelli,<sup>1,3¶\*</sup> & Jean-Jacques Panthier<sup>1¶</sup>

| Inbred strain | Infectious dose (PFU), IP |               |          |               |          |               |
|---------------|---------------------------|---------------|----------|---------------|----------|---------------|
|               | 10                        |               | 100      |               | 1000     |               |
|               | Survival                  | Days of death | Survival | Days of death | Survival | Days of death |
| MBT/Pas       | 0/5                       | dpi 3-4       | 0/5      | dpi 3-4       | 0/5      | dpi 4         |
| BALB/cByJ     | 4/5                       | dpi 13        | 0/5      | dpi 7-10      | 0/5      | dpi 7-10      |

**Supplementary Table S1.** Survival rate and days of death of MBT/Pas and BALB/cByJ 9-12 week-old male mice infected with 10, 100 or 1000 PFU of ZH548 RVFV (dpi : days post-infection).
